# Supplementary material for: Sodium-Glucose Cotransporter 2 (SGLT2) Inhibitor Increases Circulating Zinc-Α2-Glycoprotein Levels in Patients with Type 2 Diabetes
Source: PubMed Central journal article supplement (PMC5017191; doi:10.1038/srep32887), 2016-09-09
Supplement: srep32887-s1.pdf [file srep32887-s1.pdf]

# Sodium-Glucose Cotransporter 2 (SGLT2) Inhibitor Increases Circulating Zinc-A<sub>2</sub>-Glycoprotein Levels in Patients with Type 2 Diabetes

Xin Liao<sup>1\*</sup>, Xuemei Wang<sup>1\*</sup>, Haopeng Li<sup>1\*</sup>, Ling Li<sup>3</sup>, Guohao Zhang<sup>1,4</sup>, Mengliu Yang<sup>2</sup>, Lei Yuan<sup>2</sup>, Hua Liu<sup>5</sup>, Gangyi Yang<sup>1,2§</sup>, Lin Gao<sup>1§</sup>

<sup>1</sup>Department of Endocrinology, the Affiliated Hospital, Zunyi Medical University, 563003 Guizhou, China

<sup>2</sup>Department of Endocrinology, the Second Affiliated Hospital, Chongqing Medical University, 400010 Chongqing, China

<sup>3</sup>Key Laboratory of Diagnostic Medicine (Ministry of Education) and Department of Clinical Biochemistry, College of Laboratory Medicine, Chongqing Medical University, 400016, China

<sup>4</sup>Staff Hospital of Guizhou Maotal Mistillery Group Company, Renhual, 564500, Guizhou, China

<sup>5</sup>Department of Pediatrics, University of Mississippi Medical Center, Jackson, Mississippi 39216

\*These authors contributed equally to this project.

**§Correspondence:** Department of Endocrinology, Zunyi Medical University, Guizhou, China

Tel: +0851-28608213; Fax: 0851-28608213.

Email: [gaolinpro@yeah.net](mailto:gaolinpro@yeah.net); [gangyiyang@163.com](mailto:gangyiyang@163.com).

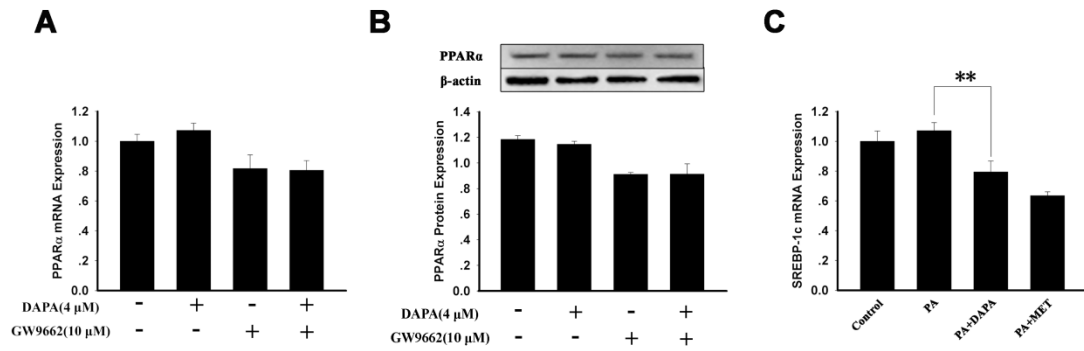

**Supplemental Figure 1.** The effects of DAPA on PPAR- $\alpha$  and SREBP-1c expression *in vitro*.

HepG2 cells were treated with 4  $\mu$ M DAPA with or without GW9662 for 24 h. Cell lysates were collected for mRNA or protein assay. (A) PPAR- $\alpha$  mRNA expression. (B) PPAR- $\alpha$  protein expression. (C) SREBP-1c mRNA expression. The results represent three separate experiments performed in duplicates as means  $\pm$  SEM. \*  $P < 0.05$ , \*\*  $P < 0.01$ .

**Supplemental Table 1** Primer sequences for quantitative Real-Time PCR assays

| Gene                   | Primer Sequences                                                         |
|------------------------|--------------------------------------------------------------------------|
| ZAG (human)            | Forward: CTTGGCTCACTCAATGACCTC<br>Reverse: CTCCGCTGCTTCTGTTATTC          |
| ADI (human)            | Forward: GCCTACCACATCACAGTC<br>Reverse: TCAGCATAGAGTCCATTACG             |
| FAS (human)            | Forward: GTCCACCAGCAACATCAG<br>Reverse: TTCTCCAGCAAGCCATCT               |
| ACC (human)            | Forward: AACCACATCTTCCTCAACTT<br>Reverse: ACTTCCATACCGCATTACC            |
| HSL (human)            | Forward: TTGAGATGCCACTGACTG<br>Reverse: CACTGTCCTGTCCTTCAC               |
| TNF- $\alpha$ (human)  | Forward: CTCCTCACCCACACCATCAGCCGCA<br>Reverse: ATAGATGGGCTCATACCAGGGCTTG |
| TNF-A (mouse)          | Forward: GTGGAAGTGGCAGAAGAG<br>Reverse: TAGACAGAAGAGCGTGGT               |
| IL-6 (human)           | Forward: AAATTCGGTACATCCTCGACGG<br>Reverse: GGAAGGTTCAAGTTGTTTTCTGC      |
| IL-6 (mouse)           | Forward: GGACCAAGACCATCCAATTC<br>Reverse: ACCACAGTGAGGAATGTCCA           |
| CRP (human)            | Forward: TTCTCGTATGCCACCAAG<br>Reverse: TTCTTCAGACTCTTCCTCAC             |
| CRP (mouse)            | Forward: CTACCAAGAAGAAGTCTAACG<br>Reverse: CAATCCAGAAGTCTACAATCC         |
| PPAR- $\gamma$ (human) | Forward: ACTCCACATTACGAAGACAT<br>Reverse: CTCCACAGACACGACATT             |
| PPAR- $\alpha$ (human) | Forward: ACCACCATTCCCACAGACAG<br>Reverse: CCAGGTTTGCGTAGAAGAGC           |
| SREBP-1c (human)       | Forward: GAGAAGCACCAAGGAGACGA<br>Reverse: TTCCCAGCCCCTCAGATAC            |

ZAG, Zinc- $\alpha_2$ -Glycoprotein; ADI, adiponectin; FAS, fatty acid synthase; ACC, acetyl-CoA carboxylase; FAS, fatty acid synthase; TNF- $\alpha$ , tumour necrosis factor- $\alpha$ ; IL-6, interleukin-6; CRP, C-reactive protein; PPAR $\gamma$ , Peroxisome proliferator activated receptor  $\gamma$  ; PPAR- $\alpha$ , Peroxisome proliferator activated receptor  $\alpha$ ; SREBP-1c, sterol regulatory element-binding protein-1c
